# Supplementary material for: Synthesis, Characterization, X-ray Structure and Biological Activities of C-5-Bromo-2-hydroxyphenylcalix[4]-2-methyl resorcinarene
Source: Molecules. 2013 Oct 29;18(11):13369–84. doi: 10.3390/molecules181113369 (PMC6270492; doi:10.3390/molecules181113369)
Supplement: Supplementary file 1 [file molecules-18-13369-s001.cif]

data_global

_audit_update_record
;
2010-08-30 # Formatted by publCIF

2013-07-24 # Formatted by IUCr publCIF system
;
#===========================================================================
_audit_creation_method               'form.cif (version 2.0)'

# 1. PROCESSING SUMMARY (IUCr Office Use Only)

_journal_data_validation_number      ?

_journal_date_recd_electronic      2013-07-24
_journal_date_to_coeditor            ?
_journal_date_from_coeditor          ?
_journal_date_accepted     ?
_journal_date_printers_first         ?
_journal_date_printers_final         ?
_journal_date_proofs_out             ?
_journal_date_proofs_in              ?
_journal_coeditor_name               ?
_journal_coeditor_code      SJ5347
_journal_coeditor_notes              ?
_journal_techeditor_code      ?
_iucr_compatibility_tag          ACTA95
_journal_techeditor_notes            ?
_journal_coden_ASTM                  ?
_journal_name_full                   ?
_journal_year                        ?
_journal_volume                      ?
_journal_issue                       ?
_journal_page_first                  ?
_journal_page_last                   ?
_journal_paper_category      QO
_journal_suppl_publ_number           ?
_journal_suppl_publ_pages            ?

#============================================================================

# 2. SUBMISSION DETAILS

_publ_contact_author_name           'Prof. Bohari M Yamin'
_publ_contact_author_address          
;
      School of Chemical Sciences and Food Technology                 
      Universiti Kebangsaan Malaysia
      43600 Bangi, Selangor
      MALAYSIA           
;
_publ_contact_author_email        'bohari@ukm.my'
_publ_contact_author_fax          '6 03 89215410'
_publ_contact_author_phone        '6 03 89214215'
_publ_requested_journal           'Acta Crystallographica E'
_publ_requested_category          EO
_publ_requested_coeditor_name      ?
_publ_contact_letter                   
;
     Date  : 4th Sep 2013

     The Managing Editor
     International Union of Crystallography
     5 Abbey Square
     Chester  CH1 2HU
     England

     Ref: Deposition of Data.

     Dear Sir,
                Attached is the cif file for the deposition at CCDC. The data is
for publication in the journal " Molecule"  entitle
Synthesis, characterisation, X-ray strcture and biological activities
 of C-5-bromo-2-hydrophenylcalix[4]-2-methylresorcinarene.
Hamza M Abosadiya, Siti Aishah Hasbullah, Seow Chew Low, Nazlina Ibrahim, Mamoru Koketsu 
and Bohari M Yamin


                
                                   Yours Sincerely,

                                   Bohari M Yamin
;
#============================================================================
# 3. TITLE AND AUTHOR LIST

_publ_section_title
;
C-5-Bromo-2-hydroxyphenylcalix[4]-2-methylresorcinarene
;

loop_
 _publ_author_name
 _publ_author_footnote
 _publ_author_address
      'Yamin, Bohari M.'      
?       
;      School of Chemical Sciences and Food Technology
       Universiti Kebangsaan Malaysia
       43600 Bangi, Selangor
       Malaysia


;
#============================================================================ 
 
data_ham1_0m 
 
_audit_creation_method            SHELXL-97 
_chemical_name_systematic 
; 
C-5-Bromo-2-hydroxyphenylcalix[4]-2-methylresorcinarene 
; 
_chemical_name_common             ? 
_chemical_melting_point           ? 
_chemical_formula_moiety          'C56 H44 Br4 O12, 8(C3 H7 N O), 4(H2 O)'

_chemical_formula_sum             'C80 H108 Br4 N8 O24' 
_chemical_formula_weight          1885.38 
 
loop_ 
 _atom_type_symbol 
 _atom_type_description 
 _atom_type_scat_dispersion_real 
 _atom_type_scat_dispersion_imag 
 _atom_type_scat_source 
 'C'  'C'   0.0033   0.0016 
 'International Tables Vol C Tables 4.2.6.8 and 6.1.1.4' 
 'H'  'H'   0.0000   0.0000 
 'International Tables Vol C Tables 4.2.6.8 and 6.1.1.4' 
 'N'  'N'   0.0061   0.0033 
 'International Tables Vol C Tables 4.2.6.8 and 6.1.1.4' 
 'O'  'O'   0.0106   0.0060 
 'International Tables Vol C Tables 4.2.6.8 and 6.1.1.4' 
 'Br'  'Br'  -0.2901   2.4595 
 'International Tables Vol C Tables 4.2.6.8 and 6.1.1.4' 
 
_symmetry_cell_setting            Triclinic 
_symmetry_space_group_name_H-M    'P -1' 
_symmetry_space_group_name_Hall    '-P 1'
 
loop_ 
 _symmetry_equiv_pos_as_xyz 
 'x, y, z' 
 '-x, -y, -z' 
 
_cell_length_a                    15.9592(16) 
_cell_length_b                    16.9417(17) 
_cell_length_c                    17.0974(17) 
_cell_angle_alpha                 68.656(3) 
_cell_angle_beta                  85.689(3) 
_cell_angle_gamma                 81.631(3) 
_cell_volume                      4258.6(7) 
_cell_formula_units_Z             2 
_cell_measurement_temperature     100(2) 
_cell_measurement_reflns_used     22965 
_cell_measurement_theta_min       2.8 
_cell_measurement_theta_max       26.0 
 
_exptl_crystal_description        block 
_exptl_crystal_colour             yellow 
_exptl_crystal_size_max           0.42 
_exptl_crystal_size_mid           0.37 
_exptl_crystal_size_min           0.24 
_exptl_crystal_density_meas       ? 
_exptl_crystal_density_diffrn     1.470 
_exptl_crystal_density_method     'not measured' 
_exptl_crystal_F_000              1952 
_exptl_absorpt_coefficient_mu     1.969 
_exptl_absorpt_correction_type    multi-scan 
_exptl_absorpt_correction_T_min   0.4918 
_exptl_absorpt_correction_T_max   0.6494 
_exptl_absorpt_process_details    'SADABS (Bruker, 2000)'
 
_exptl_special_details 
; 
 ? 

; 
 
_diffrn_ambient_temperature       100(2) 
_diffrn_radiation_wavelength      0.71073 
_diffrn_radiation_type            MoK\a 
_diffrn_radiation_source          'fine-focus sealed tube' 
_diffrn_radiation_monochromator   graphite 
_diffrn_measurement_device_type   
;
Bruker SMART APEX CCD area-detector diffractometer
;
_diffrn_measurement_method        '\w scans'
_diffrn_detector_area_resol_mean  83.66
_diffrn_standards_number          0 
_diffrn_standards_interval_count  0 
_diffrn_standards_interval_time   0 
_diffrn_standards_decay_%         0 
_diffrn_reflns_number             130536 
_diffrn_reflns_av_R_equivalents   0.1070 
_diffrn_reflns_av_sigmaI/netI     0.0614 
_diffrn_reflns_limit_h_min        -19 
_diffrn_reflns_limit_h_max        19 
_diffrn_reflns_limit_k_min        -20 
_diffrn_reflns_limit_k_max        20 
_diffrn_reflns_limit_l_min        -21 
_diffrn_reflns_limit_l_max        21 
_diffrn_reflns_theta_min          2.8 
_diffrn_reflns_theta_max          26.0 
_reflns_number_total              16701 
_reflns_number_gt                 11455 
_reflns_threshold_expression      I>2\s(I) 
 
_computing_data_collection        'SMART (Bruker, 2000)' 
_computing_cell_refinement        'SAINT (Bruker, 2000)'
_computing_data_reduction         'SAINT (Bruker, 2000)'
_computing_structure_solution     'SHELXTL (Sheldrick, 2008)' 
_computing_structure_refinement   'SHELXTL (Sheldrick, 2008)' 
_computing_molecular_graphics     'SHELXTL (Sheldrick, 2008)'
_computing_publication_material    
;                                                             
SHELXTL, PARST (Nardelli, 1995) and PLATON (Spek, 2009)
;  
 
_refine_special_details 
; 
 Refinement of F^2^ against ALL reflections.  The weighted R-factor wR and 
 goodness of fit S are based on F^2^, conventional R-factors R are based 
 on F, with F set to zero for negative F^2^. The threshold expression of 
 F^2^ > 2sigma(F^2^) is used only for calculating R-factors(gt) etc. and is 
 not relevant to the choice of reflections for refinement.  R-factors based 
 on F^2^ are statistically about twice as large as those based on F, and R- 
 factors based on ALL data will be even larger. 
; 
 
_refine_ls_structure_factor_coef  Fsqd  
_refine_ls_matrix_type            full 
_refine_ls_weighting_scheme       calc  
_refine_ls_weighting_details 
 'calc w=1/[\s^2^(Fo^2^)+(0.0762P)^2^+24.3903P] where P=(Fo^2^+2Fc^2^)/3' 
_atom_sites_solution_primary      direct 
_atom_sites_solution_secondary    difmap 
_atom_sites_solution_hydrogens    geom 
_refine_ls_hydrogen_treatment     mixed 
_refine_ls_extinction_method      none 
_refine_ls_extinction_coef        ? 
_refine_ls_number_reflns          16701 
_refine_ls_number_parameters      1101 
_refine_ls_number_restraints      8 
_refine_ls_R_factor_all           0.1107 
_refine_ls_R_factor_gt            0.0661 
_refine_ls_wR_factor_ref          0.1997 
_refine_ls_wR_factor_gt           0.1652 
_refine_ls_goodness_of_fit_ref    1.133 
_refine_ls_restrained_S_all       1.133 
_refine_ls_shift/su_max           0.001 
_refine_ls_shift/su_mean          0.000 
 
loop_ 
 _atom_site_label 
 _atom_site_type_symbol 
 _atom_site_fract_x 
 _atom_site_fract_y 
 _atom_site_fract_z 
 _atom_site_U_iso_or_equiv 
 _atom_site_adp_type 
 _atom_site_occupancy 
 _atom_site_symmetry_multiplicity 
 _atom_site_calc_flag 
 _atom_site_refinement_flags 
 _atom_site_disorder_assembly 
 _atom_site_disorder_group 
Br1 Br 0.53223(4) 0.66515(5) 0.54968(4) 0.02691(17) Uani 1 1 d . . . 
Br2 Br 0.04483(4) 0.56745(4) 1.08999(4) 0.02909(18) Uani 1 1 d . . . 
Br3 Br -0.06129(4) 0.84734(5) 0.92626(4) 0.02955(18) Uani 1 1 d . . . 
Br4 Br 0.45075(4) 0.92860(4) 0.42942(4) 0.02587(17) Uani 1 1 d . . . 
O1 O -0.0065(2) 0.8311(2) 0.6600(2) 0.0137(8) Uani 1 1 d . . . 
H1 H -0.0504 0.8160 0.6885 0.021 Uiso 1 1 calc R . . 
O2 O 0.1065(2) 0.5483(2) 0.8336(2) 0.0175(9) Uani 1 1 d . . . 
H2 H 0.1546 0.5210 0.8476 0.026 Uiso 1 1 calc R . . 
O3 O 0.2153(3) 0.4961(3) 0.6002(2) 0.0191(9) Uani 1 1 d . . . 
H3 H 0.2059 0.4856 0.5575 0.029 Uiso 1 1 calc R . . 
O4 O 0.3388(3) 0.3911(2) 0.8127(2) 0.0165(8) Uani 1 1 d . . . 
H4 H 0.3464 0.3415 0.8489 0.025 Uiso 1 1 calc R . . 
O5 O 0.4159(2) 0.4770(2) 1.0356(2) 0.0136(8) Uani 1 1 d . . . 
H5 H 0.4499 0.4317 1.0489 0.020 Uiso 1 1 calc R . . 
O6 O 0.3626(3) 0.7294(3) 1.0624(3) 0.0206(9) Uani 1 1 d . . . 
H6 H 0.3620 0.7526 1.0983 0.031 Uiso 1 1 calc R . . 
O7 O 0.4956(2) 0.6709(2) 0.8526(2) 0.0142(8) Uani 1 1 d . . . 
H7 H 0.5249 0.6710 0.8097 0.021 Uiso 1 1 calc R . . 
O8 O 0.3908(3) 0.9547(2) 0.6798(2) 0.0179(9) Uani 1 1 d . . . 
H8 H 0.3624 0.9973 0.6874 0.027 Uiso 1 1 calc R . . 
O9 O 0.2618(3) 0.9963(3) 0.9150(2) 0.0195(9) Uani 1 1 d . . . 
H9 H 0.2679 1.0036 0.9602 0.029 Uiso 1 1 calc R . . 
O10 O 0.1599(2) 1.1209(2) 0.6787(3) 0.0177(9) Uani 1 1 d . . . 
H10 H 0.2104 1.1288 0.6803 0.027 Uiso 1 1 calc R . . 
O11 O 0.0857(2) 1.0251(2) 0.4637(2) 0.0143(8) Uani 1 1 d . . . 
H11 H 0.0618 1.0755 0.4430 0.021 Uiso 1 1 calc R . . 
O12 O 0.1357(2) 0.7637(3) 0.4484(2) 0.0176(8) Uani 1 1 d . . . 
H12 H 0.1428 0.7303 0.4216 0.026 Uiso 1 1 calc R . . 
O13 O 0.4731(3) 1.1100(3) 0.8698(3) 0.0269(10) Uani 1 1 d . . . 
O14 O 0.7505(3) 0.7996(4) 0.9489(3) 0.0444(14) Uani 1 1 d . . . 
O15 O 0.6014(3) 0.6090(3) 0.7618(2) 0.0191(9) Uani 1 1 d . . . 
O16 O 0.9844(3) 0.6625(3) 0.3200(3) 0.0381(12) Uani 1 1 d . . . 
O17 O 0.7679(3) 0.0947(4) 0.8175(3) 0.0471(15) Uani 1 1 d . . . 
O18 O 0.3311(3) 0.1188(3) 0.6809(3) 0.0403(12) Uani 1 1 d . . . 
O19 O 0.1799(3) 0.1883(3) 0.3102(3) 0.0387(13) Uani 1 1 d . . . 
O20 O 0.1645(3) 0.4752(3) 0.4633(3) 0.0244(10) Uani 1 1 d . . . 
O1W O 0.6179(3) 0.1955(3) 0.8253(3) 0.0279(10) Uani 1 1 d D . . 
H1WA H 0.581(4) 0.165(4) 0.831(5) 0.042 Uiso 1 1 d D . . 
H1WB H 0.661(3) 0.165(4) 0.819(5) 0.042 Uiso 1 1 d D . . 
O2W O 0.1463(3) 0.6559(3) 0.3636(3) 0.0277(10) Uani 1 1 d D . . 
H2WA H 0.0953(12) 0.661(5) 0.356(5) 0.042 Uiso 1 1 d D . . 
H2WB H 0.152(5) 0.6038(10) 0.388(4) 0.042 Uiso 1 1 d D . . 
O3W O 0.6629(3) 0.7770(3) 0.1120(3) 0.0268(10) Uani 1 1 d D . . 
H3WA H 0.616(2) 0.802(4) 0.118(5) 0.040 Uiso 1 1 d D . . 
H3WB H 0.689(4) 0.786(5) 0.067(3) 0.040 Uiso 1 1 d D . . 
O4W O 0.2918(3) 0.0362(4) 0.0490(3) 0.0350(12) Uani 1 1 d D . . 
H4WA H 0.272(5) 0.000(4) 0.090(3) 0.053 Uiso 1 1 d D . . 
H4WB H 0.271(5) 0.084(2) 0.047(6) 0.053 Uiso 1 1 d D . . 
N1 N 0.4899(3) 0.9672(3) 0.8912(3) 0.0212(11) Uani 1 1 d . . . 
N2 N 0.7730(3) 0.6788(3) 0.9173(3) 0.0228(11) Uani 1 1 d . . . 
N3 N 0.6048(3) 0.4828(3) 0.7428(3) 0.0200(11) Uani 1 1 d . . . 
N4 N 0.8898(3) 0.7354(3) 0.2174(3) 0.0228(11) Uani 1 1 d . . . 
N5 N 0.8666(3) 0.0476(3) 0.7388(3) 0.0246(12) Uani 1 1 d . . . 
N6 N 0.3631(4) 0.2483(3) 0.6660(3) 0.0255(12) Uani 1 1 d . . . 
N7 N 0.2720(3) 0.1869(3) 0.4061(3) 0.0224(11) Uani 1 1 d . . . 
N8 N 0.0564(3) 0.4286(3) 0.4185(3) 0.0177(10) Uani 1 1 d . . . 
C1 C 0.1921(3) 0.7027(3) 0.6438(3) 0.0108(11) Uani 1 1 d . . . 
H1A H 0.2415 0.7078 0.6087 0.013 Uiso 1 1 calc R . . 
C2 C 0.1290(3) 0.7720(3) 0.6268(3) 0.0122(11) Uani 1 1 d . . . 
C3 C 0.0566(3) 0.7623(3) 0.6788(3) 0.0102(10) Uani 1 1 d . . . 
C4 C 0.0490(3) 0.6884(3) 0.7493(3) 0.0120(11) Uani 1 1 d . . . 
C5 C 0.1145(3) 0.6214(3) 0.7633(3) 0.0120(11) Uani 1 1 d . . . 
C6 C 0.1856(3) 0.6254(3) 0.7109(3) 0.0109(11) Uani 1 1 d . . . 
C7 C -0.0249(4) 0.6815(4) 0.8094(4) 0.0220(13) Uani 1 1 d . . . 
H7A H -0.0337 0.7315 0.8263 0.033 Uiso 1 1 calc R . . 
H7B H -0.0138 0.6296 0.8591 0.033 Uiso 1 1 calc R . . 
H7C H -0.0758 0.6789 0.7821 0.033 Uiso 1 1 calc R . . 
C8 C 0.2541(3) 0.5493(3) 0.7280(3) 0.0109(11) Uani 1 1 d . . . 
H8A H 0.2243 0.4984 0.7376 0.013 Uiso 1 1 calc R . . 
C9 C 0.3123(3) 0.5577(3) 0.6517(3) 0.0130(11) Uani 1 1 d . . . 
C10 C 0.2891(3) 0.5305(3) 0.5885(3) 0.0142(11) Uani 1 1 d . . . 
C11 C 0.3406(4) 0.5404(4) 0.5172(3) 0.0179(12) Uani 1 1 d . . . 
H11A H 0.3253 0.5206 0.4755 0.021 Uiso 1 1 calc R . . 
C12 C 0.4135(4) 0.5784(4) 0.5058(4) 0.0190(12) Uani 1 1 d . . . 
H12A H 0.4486 0.5844 0.4571 0.023 Uiso 1 1 calc R . . 
C13 C 0.4347(3) 0.6076(4) 0.5661(4) 0.0155(12) Uani 1 1 d . . . 
C14 C 0.3850(4) 0.5960(4) 0.6393(3) 0.0152(12) Uani 1 1 d . . . 
H14 H 0.4016 0.6149 0.6810 0.018 Uiso 1 1 calc R . . 
C15 C 0.3011(3) 0.5313(3) 0.8084(3) 0.0111(11) Uani 1 1 d . . . 
C16 C 0.3421(3) 0.4494(3) 0.8499(3) 0.0104(10) Uani 1 1 d . . . 
C17 C 0.3835(3) 0.4283(3) 0.9257(3) 0.0106(11) Uani 1 1 d . . . 
C18 C 0.3826(3) 0.4926(3) 0.9590(3) 0.0101(10) Uani 1 1 d . . . 
C19 C 0.3449(3) 0.5758(3) 0.9175(3) 0.0103(10) Uani 1 1 d . . . 
C20 C 0.3054(3) 0.5936(3) 0.8419(3) 0.0113(11) Uani 1 1 d . . . 
H20 H 0.2807 0.6504 0.8124 0.014 Uiso 1 1 calc R . . 
C21 C 0.4275(4) 0.3399(4) 0.9691(4) 0.0173(12) Uani 1 1 d . . . 
H21A H 0.3994 0.2985 0.9561 0.026 Uiso 1 1 calc R . . 
H21B H 0.4250 0.3267 1.0299 0.026 Uiso 1 1 calc R . . 
H21C H 0.4868 0.3366 0.9496 0.026 Uiso 1 1 calc R . . 
C22 C 0.3508(3) 0.6457(3) 0.9525(3) 0.0103(11) Uani 1 1 d . . . 
H22 H 0.4046 0.6291 0.9843 0.012 Uiso 1 1 calc R . . 
C23 C 0.2792(3) 0.6522(3) 1.0151(3) 0.0110(11) Uani 1 1 d . . . 
C24 C 0.2893(3) 0.6955(4) 1.0689(3) 0.0154(12) Uani 1 1 d . . . 
C25 C 0.2245(4) 0.7040(4) 1.1263(4) 0.0209(13) Uani 1 1 d . . . 
H25 H 0.2306 0.7352 1.1613 0.025 Uiso 1 1 calc R . . 
C26 C 0.1513(4) 0.6666(4) 1.1320(4) 0.0208(13) Uani 1 1 d . . . 
H26 H 0.1076 0.6713 1.1716 0.025 Uiso 1 1 calc R . . 
C27 C 0.1423(3) 0.6232(4) 1.0805(4) 0.0168(12) Uani 1 1 d . . . 
C28 C 0.2054(4) 0.6161(4) 1.0214(3) 0.0157(12) Uani 1 1 d . . . 
H28 H 0.1976 0.5864 0.9854 0.019 Uiso 1 1 calc R . . 
C29 C 0.3596(3) 0.7304(3) 0.8818(3) 0.0099(10) Uani 1 1 d . . . 
C30 C 0.4324(3) 0.7384(3) 0.8311(3) 0.0115(11) Uani 1 1 d . . . 
C31 C 0.4428(3) 0.8127(3) 0.7615(3) 0.0116(11) Uani 1 1 d . . . 
C32 C 0.3775(3) 0.8820(3) 0.7466(3) 0.0110(11) Uani 1 1 d . . . 
C33 C 0.3045(3) 0.8762(3) 0.7969(3) 0.0106(11) Uani 1 1 d . . . 
C34 C 0.2967(3) 0.7996(3) 0.8638(3) 0.0098(10) Uani 1 1 d . . . 
H34 H 0.2466 0.7948 0.8980 0.012 Uiso 1 1 calc R . . 
C35 C 0.5217(4) 0.8200(4) 0.7066(4) 0.0202(13) Uani 1 1 d . . . 
H35A H 0.5716 0.8064 0.7415 0.030 Uiso 1 1 calc R . . 
H35B H 0.5201 0.8784 0.6657 0.030 Uiso 1 1 calc R . . 
H35C H 0.5249 0.7799 0.6768 0.030 Uiso 1 1 calc R . . 
C36 C 0.2341(3) 0.9523(3) 0.7787(3) 0.0114(11) Uani 1 1 d . . . 
H36 H 0.2621 1.0032 0.7734 0.014 Uiso 1 1 calc R . . 
C37 C 0.1706(3) 0.9406(3) 0.8516(3) 0.0112(11) Uani 1 1 d . . . 
C38 C 0.1889(4) 0.9621(4) 0.9195(3) 0.0157(12) Uani 1 1 d . . . 
C39 C 0.1336(4) 0.9486(4) 0.9886(4) 0.0233(13) Uani 1 1 d . . . 
H39 H 0.1465 0.9634 1.0345 0.028 Uiso 1 1 calc R . . 
C40 C 0.0594(4) 0.9135(4) 0.9909(4) 0.0211(13) Uani 1 1 d . . . 
H40 H 0.0218 0.9036 1.0383 0.025 Uiso 1 1 calc R . . 
C41 C 0.0413(4) 0.8933(4) 0.9236(4) 0.0177(12) Uani 1 1 d . . . 
C42 C 0.0961(3) 0.9050(3) 0.8554(3) 0.0135(11) Uani 1 1 d . . . 
H42 H 0.0831 0.8888 0.8105 0.016 Uiso 1 1 calc R . . 
C43 C 0.1920(3) 0.9728(3) 0.6949(3) 0.0109(11) Uani 1 1 d . . . 
C44 C 0.1578(3) 1.0559(3) 0.6485(3) 0.0119(11) Uani 1 1 d . . . 
C45 C 0.1206(3) 1.0773(3) 0.5709(3) 0.0103(11) Uani 1 1 d . . . 
C46 C 0.1157(3) 1.0115(3) 0.5415(3) 0.0107(11) Uani 1 1 d . . . 
C47 C 0.1458(3) 0.9260(3) 0.5884(3) 0.0103(11) Uani 1 1 d . . . 
C48 C 0.1838(3) 0.9088(3) 0.6642(3) 0.0103(10) Uani 1 1 d . . . 
H48 H 0.2048 0.8514 0.6962 0.012 Uiso 1 1 calc R . . 
C49 C 0.0846(3) 1.1689(3) 0.5224(3) 0.0143(11) Uani 1 1 d . . . 
H49A H 0.0260 1.1795 0.5413 0.021 Uiso 1 1 calc R . . 
H49B H 0.0858 1.1783 0.4622 0.021 Uiso 1 1 calc R . . 
H49C H 0.1187 1.2079 0.5321 0.021 Uiso 1 1 calc R . . 
C50 C 0.1388(3) 0.8559(3) 0.5546(3) 0.0101(10) Uani 1 1 d . . . 
H50 H 0.0861 0.8727 0.5212 0.012 Uiso 1 1 calc R . . 
C51 C 0.2131(3) 0.8474(3) 0.4955(3) 0.0105(11) Uani 1 1 d . . . 
C52 C 0.2082(3) 0.7989(3) 0.4441(3) 0.0130(11) Uani 1 1 d . . . 
C53 C 0.2767(4) 0.7876(4) 0.3916(4) 0.0184(12) Uani 1 1 d . . . 
H53 H 0.2735 0.7537 0.3585 0.022 Uiso 1 1 calc R . . 
C54 C 0.3491(4) 0.8252(4) 0.3873(4) 0.0187(12) Uani 1 1 d . . . 
H54 H 0.3953 0.8179 0.3512 0.022 Uiso 1 1 calc R . . 
C55 C 0.3531(3) 0.8735(4) 0.4363(3) 0.0155(12) Uani 1 1 d . . . 
C56 C 0.2868(3) 0.8837(3) 0.4912(3) 0.0122(11) Uani 1 1 d . . . 
H56 H 0.2921 0.9155 0.5258 0.015 Uiso 1 1 calc R . . 
C57 C 0.5498(4) 0.9732(5) 0.8217(4) 0.0314(16) Uani 1 1 d . . . 
H57A H 0.5657 1.0311 0.7979 0.047 Uiso 1 1 calc R . . 
H57B H 0.5236 0.9604 0.7783 0.047 Uiso 1 1 calc R . . 
H57C H 0.6005 0.9321 0.8418 0.047 Uiso 1 1 calc R . . 
C58 C 0.4658(5) 0.8838(4) 0.9413(4) 0.0300(15) Uani 1 1 d . . . 
H58A H 0.4211 0.8899 0.9820 0.045 Uiso 1 1 calc R . . 
H58B H 0.5151 0.8466 0.9711 0.045 Uiso 1 1 calc R . . 
H58C H 0.4447 0.8586 0.9045 0.045 Uiso 1 1 calc R . . 
C59 C 0.4569(4) 1.0356(4) 0.9076(4) 0.0202(13) Uani 1 1 d . . . 
H59 H 0.4166 1.0274 0.9528 0.024 Uiso 1 1 calc R . . 
C60 C 0.8226(4) 0.6301(5) 0.9907(4) 0.0349(17) Uani 1 1 d . . . 
H60A H 0.8559 0.6678 1.0039 0.052 Uiso 1 1 calc R . . 
H60B H 0.8609 0.5844 0.9796 0.052 Uiso 1 1 calc R . . 
H60C H 0.7847 0.6050 1.0384 0.052 Uiso 1 1 calc R . . 
C61 C 0.7540(4) 0.6345(4) 0.8634(4) 0.0297(15) Uani 1 1 d . . . 
H61A H 0.7244 0.6755 0.8137 0.045 Uiso 1 1 calc R . . 
H61B H 0.7178 0.5905 0.8943 0.045 Uiso 1 1 calc R . . 
H61C H 0.8069 0.6076 0.8457 0.045 Uiso 1 1 calc R . . 
C62 C 0.7428(4) 0.7591(5) 0.9028(4) 0.0317(16) Uani 1 1 d . . . 
H62 H 0.7124 0.7888 0.8526 0.038 Uiso 1 1 calc R . . 
C63 C 0.6891(4) 0.4882(4) 0.7043(4) 0.0301(15) Uani 1 1 d . . . 
H63A H 0.6852 0.5273 0.6457 0.045 Uiso 1 1 calc R . . 
H63B H 0.7149 0.4314 0.7063 0.045 Uiso 1 1 calc R . . 
H63C H 0.7241 0.5097 0.7349 0.045 Uiso 1 1 calc R . . 
C64 C 0.5579(5) 0.4174(4) 0.7405(4) 0.0301(15) Uani 1 1 d . . . 
H64A H 0.5053 0.4179 0.7738 0.045 Uiso 1 1 calc R . . 
H64B H 0.5921 0.3615 0.7638 0.045 Uiso 1 1 calc R . . 
H64C H 0.5444 0.4281 0.6822 0.045 Uiso 1 1 calc R . . 
C65 C 0.5688(4) 0.5454(4) 0.7679(3) 0.0188(12) Uani 1 1 d . . . 
H65 H 0.5135 0.5409 0.7924 0.023 Uiso 1 1 calc R . . 
C66 C 0.8511(5) 0.8171(5) 0.1607(4) 0.0344(16) Uani 1 1 d . . . 
H66A H 0.8700 0.8633 0.1740 0.052 Uiso 1 1 calc R . . 
H66B H 0.7893 0.8202 0.1672 0.052 Uiso 1 1 calc R . . 
H66C H 0.8679 0.8232 0.1027 0.052 Uiso 1 1 calc R . . 
C67 C 0.8634(5) 0.6591(5) 0.2122(5) 0.0410(19) Uani 1 1 d . . . 
H67A H 0.8904 0.6489 0.1627 0.062 Uiso 1 1 calc R . . 
H67B H 0.8017 0.6667 0.2075 0.062 Uiso 1 1 calc R . . 
H67C H 0.8804 0.6101 0.2629 0.062 Uiso 1 1 calc R . . 
C68 C 0.9483(4) 0.7299(5) 0.2710(4) 0.0284(15) Uani 1 1 d . . . 
H68 H 0.9636 0.7818 0.2716 0.034 Uiso 1 1 calc R . . 
C69 C 0.9448(5) 0.0430(6) 0.6938(5) 0.050(2) Uani 1 1 d . . . 
H69A H 0.9339 0.0610 0.6338 0.075 Uiso 1 1 calc R . . 
H69B H 0.9730 -0.0159 0.7140 0.075 Uiso 1 1 calc R . . 
H69C H 0.9812 0.0807 0.7026 0.075 Uiso 1 1 calc R . . 
C70 C 0.8096(6) -0.0111(6) 0.7291(5) 0.052(2) Uani 1 1 d . . . 
H70A H 0.8313 -0.0704 0.7618 0.078 Uiso 1 1 calc R . . 
H70B H 0.8080 -0.0039 0.6697 0.078 Uiso 1 1 calc R . . 
H70C H 0.7523 0.0027 0.7495 0.078 Uiso 1 1 calc R . . 
C71 C 0.8400(6) 0.0976(6) 0.7792(5) 0.051(2) Uani 1 1 d . . . 
H71 H 0.8749 0.1379 0.7806 0.061 Uiso 1 1 calc R . . 
C72 C 0.4246(5) 0.2960(5) 0.6804(4) 0.0381(18) Uani 1 1 d . . . 
H72A H 0.4728 0.2563 0.7101 0.057 Uiso 1 1 calc R . . 
H72B H 0.3984 0.3290 0.7144 0.057 Uiso 1 1 calc R . . 
H72C H 0.4444 0.3349 0.6264 0.057 Uiso 1 1 calc R . . 
C73 C 0.2865(5) 0.2947(4) 0.6231(5) 0.043(2) Uani 1 1 d . . . 
H73A H 0.2518 0.2544 0.6166 0.065 Uiso 1 1 calc R . . 
H73B H 0.3011 0.3348 0.5676 0.065 Uiso 1 1 calc R . . 
H73C H 0.2547 0.3263 0.6561 0.065 Uiso 1 1 calc R . . 
C74 C 0.3780(4) 0.1632(4) 0.6903(4) 0.0244(14) Uani 1 1 d . . . 
H74 H 0.4300 0.1361 0.7171 0.029 Uiso 1 1 calc R . . 
C75 C 0.2579(5) 0.2784(4) 0.3855(4) 0.0339(16) Uani 1 1 d . . . 
H75A H 0.3089 0.3033 0.3577 0.051 Uiso 1 1 calc R . . 
H75B H 0.2453 0.2910 0.4370 0.051 Uiso 1 1 calc R . . 
H75C H 0.2100 0.3030 0.3477 0.051 Uiso 1 1 calc R . . 
C76 C 0.3290(4) 0.1365(5) 0.4741(4) 0.0294(15) Uani 1 1 d . . . 
H76A H 0.3031 0.1377 0.5276 0.044 Uiso 1 1 calc R . . 
H76B H 0.3827 0.1605 0.4645 0.044 Uiso 1 1 calc R . . 
H76C H 0.3394 0.0773 0.4761 0.044 Uiso 1 1 calc R . . 
C77 C 0.2314(4) 0.1505(4) 0.3669(4) 0.0289(15) Uani 1 1 d . . . 
H77 H 0.2424 0.0901 0.3834 0.035 Uiso 1 1 calc R . . 
C78 C 0.0762(4) 0.4699(4) 0.3290(4) 0.0263(14) Uani 1 1 d . . . 
H78A H 0.0311 0.5164 0.3035 0.039 Uiso 1 1 calc R . . 
H78B H 0.0805 0.4279 0.3014 0.039 Uiso 1 1 calc R . . 
H78C H 0.1302 0.4931 0.3223 0.039 Uiso 1 1 calc R . . 
C79 C -0.0168(4) 0.3821(4) 0.4397(4) 0.0255(14) Uani 1 1 d . . . 
H79A H -0.0248 0.3587 0.5009 0.038 Uiso 1 1 calc R . . 
H79B H -0.0076 0.3353 0.4180 0.038 Uiso 1 1 calc R . . 
H79C H -0.0674 0.4209 0.4145 0.038 Uiso 1 1 calc R . . 
C80 C 0.1015(4) 0.4358(4) 0.4767(4) 0.0191(12) Uani 1 1 d . . . 
H80 H 0.0845 0.4088 0.5337 0.023 Uiso 1 1 calc R . . 
 
loop_ 
 _atom_site_aniso_label 
 _atom_site_aniso_U_11 
 _atom_site_aniso_U_22 
 _atom_site_aniso_U_33 
 _atom_site_aniso_U_23 
 _atom_site_aniso_U_13 
 _atom_site_aniso_U_12 
Br1 0.0233(3) 0.0429(4) 0.0182(3) -0.0121(3) 0.0060(2) -0.0160(3) 
Br2 0.0201(3) 0.0379(4) 0.0327(4) -0.0142(3) 0.0081(3) -0.0148(3) 
Br3 0.0241(3) 0.0422(4) 0.0288(4) -0.0178(3) 0.0114(3) -0.0169(3) 
Br4 0.0169(3) 0.0297(4) 0.0321(4) -0.0112(3) 0.0080(2) -0.0104(2) 
O1 0.0091(18) 0.013(2) 0.014(2) 0.0008(16) 0.0007(15) -0.0022(15) 
O2 0.016(2) 0.013(2) 0.014(2) 0.0057(16) 0.0017(16) -0.0021(16) 
O3 0.025(2) 0.022(2) 0.014(2) -0.0087(18) -0.0035(17) -0.0080(18) 
O4 0.024(2) 0.012(2) 0.013(2) -0.0043(16) -0.0057(16) 0.0008(17) 
O5 0.016(2) 0.012(2) 0.0095(19) -0.0012(15) -0.0073(15) 0.0045(15) 
O6 0.021(2) 0.031(3) 0.018(2) -0.0171(19) 0.0056(17) -0.0107(18) 
O7 0.0140(19) 0.013(2) 0.0111(19) -0.0010(16) 0.0044(15) 0.0014(15) 
O8 0.024(2) 0.011(2) 0.013(2) 0.0009(16) 0.0069(16) -0.0003(17) 
O9 0.023(2) 0.028(2) 0.011(2) -0.0114(18) 0.0014(16) -0.0060(18) 
O10 0.020(2) 0.015(2) 0.023(2) -0.0117(17) -0.0016(17) -0.0019(17) 
O11 0.019(2) 0.013(2) 0.0080(18) 0.0001(15) -0.0037(15) -0.0006(16) 
O12 0.021(2) 0.020(2) 0.016(2) -0.0110(17) 0.0015(16) -0.0062(17) 
O13 0.033(2) 0.019(2) 0.028(2) -0.0038(19) -0.009(2) -0.0065(19) 
O14 0.048(3) 0.051(3) 0.049(3) -0.033(3) 0.016(3) -0.025(3) 
O15 0.024(2) 0.018(2) 0.017(2) -0.0069(17) 0.0028(17) -0.0042(17) 
O16 0.034(3) 0.039(3) 0.040(3) -0.015(3) -0.016(2) 0.008(2) 
O17 0.043(3) 0.067(4) 0.020(3) -0.012(3) 0.008(2) 0.014(3) 
O18 0.044(3) 0.035(3) 0.040(3) -0.011(2) -0.001(2) -0.007(2) 
O19 0.025(2) 0.052(3) 0.026(3) 0.006(2) -0.008(2) -0.013(2) 
O20 0.025(2) 0.030(3) 0.023(2) -0.0116(19) -0.0071(18) -0.0088(19) 
O1W 0.030(3) 0.033(3) 0.029(2) -0.019(2) 0.003(2) -0.012(2) 
O2W 0.031(3) 0.029(3) 0.027(3) -0.015(2) -0.003(2) -0.005(2) 
O3W 0.033(3) 0.018(2) 0.028(3) -0.007(2) -0.004(2) -0.002(2) 
O4W 0.037(3) 0.050(3) 0.026(3) -0.022(3) -0.003(2) -0.006(3) 
N1 0.027(3) 0.016(3) 0.021(3) -0.005(2) -0.009(2) -0.005(2) 
N2 0.023(3) 0.029(3) 0.019(3) -0.009(2) 0.001(2) -0.011(2) 
N3 0.024(3) 0.022(3) 0.016(3) -0.010(2) 0.002(2) -0.001(2) 
N4 0.023(3) 0.027(3) 0.020(3) -0.010(2) -0.001(2) -0.004(2) 
N5 0.027(3) 0.024(3) 0.018(3) -0.003(2) 0.002(2) 0.000(2) 
N6 0.039(3) 0.018(3) 0.020(3) -0.009(2) 0.014(2) -0.009(2) 
N7 0.018(3) 0.028(3) 0.018(3) -0.004(2) 0.004(2) -0.003(2) 
N8 0.018(2) 0.019(3) 0.019(3) -0.009(2) -0.002(2) -0.003(2) 
C1 0.012(3) 0.014(3) 0.007(2) -0.003(2) -0.001(2) -0.005(2) 
C2 0.015(3) 0.013(3) 0.010(3) -0.004(2) -0.001(2) -0.005(2) 
C3 0.012(3) 0.012(3) 0.010(3) -0.007(2) -0.002(2) -0.002(2) 
C4 0.014(3) 0.012(3) 0.010(3) -0.002(2) 0.000(2) -0.005(2) 
C5 0.017(3) 0.011(3) 0.007(2) 0.000(2) -0.004(2) -0.006(2) 
C6 0.016(3) 0.008(3) 0.008(3) -0.001(2) -0.003(2) -0.004(2) 
C7 0.015(3) 0.021(3) 0.025(3) -0.004(3) 0.004(2) -0.001(2) 
C8 0.016(3) 0.011(3) 0.006(2) -0.002(2) -0.002(2) -0.005(2) 
C9 0.017(3) 0.011(3) 0.011(3) -0.005(2) -0.005(2) 0.004(2) 
C10 0.019(3) 0.008(3) 0.017(3) -0.007(2) -0.005(2) 0.000(2) 
C11 0.026(3) 0.020(3) 0.011(3) -0.010(2) -0.004(2) -0.001(2) 
C12 0.019(3) 0.026(3) 0.015(3) -0.012(3) 0.003(2) -0.003(2) 
C13 0.013(3) 0.014(3) 0.016(3) -0.002(2) -0.003(2) 0.001(2) 
C14 0.020(3) 0.016(3) 0.012(3) -0.008(2) -0.004(2) 0.000(2) 
C15 0.011(3) 0.014(3) 0.006(2) 0.000(2) -0.002(2) -0.004(2) 
C16 0.014(3) 0.008(3) 0.009(3) -0.003(2) 0.002(2) -0.004(2) 
C17 0.010(2) 0.011(3) 0.008(3) 0.001(2) -0.001(2) -0.002(2) 
C18 0.010(2) 0.012(3) 0.008(2) -0.002(2) -0.002(2) -0.001(2) 
C19 0.013(3) 0.010(3) 0.005(2) 0.000(2) 0.003(2) -0.003(2) 
C20 0.013(3) 0.010(3) 0.008(3) -0.001(2) 0.000(2) -0.001(2) 
C21 0.019(3) 0.014(3) 0.018(3) -0.004(2) -0.008(2) 0.000(2) 
C22 0.011(3) 0.012(3) 0.006(2) 0.000(2) -0.001(2) -0.003(2) 
C23 0.015(3) 0.009(3) 0.007(2) 0.000(2) 0.001(2) 0.000(2) 
C24 0.015(3) 0.018(3) 0.012(3) -0.005(2) 0.001(2) -0.002(2) 
C25 0.026(3) 0.024(3) 0.018(3) -0.015(3) 0.005(2) -0.001(3) 
C26 0.019(3) 0.026(3) 0.018(3) -0.010(3) 0.009(2) -0.003(2) 
C27 0.009(3) 0.018(3) 0.022(3) -0.004(2) -0.003(2) -0.005(2) 
C28 0.019(3) 0.016(3) 0.011(3) -0.005(2) -0.001(2) 0.000(2) 
C29 0.015(3) 0.008(3) 0.010(3) -0.005(2) -0.001(2) -0.006(2) 
C30 0.013(3) 0.015(3) 0.008(3) -0.006(2) -0.003(2) -0.001(2) 
C31 0.013(3) 0.014(3) 0.009(3) -0.004(2) 0.000(2) -0.007(2) 
C32 0.014(3) 0.012(3) 0.008(3) -0.005(2) 0.002(2) -0.003(2) 
C33 0.012(3) 0.011(3) 0.009(3) -0.004(2) -0.003(2) -0.001(2) 
C34 0.009(2) 0.016(3) 0.005(2) -0.004(2) 0.0005(19) -0.006(2) 
C35 0.020(3) 0.015(3) 0.020(3) -0.001(2) 0.010(2) -0.002(2) 
C36 0.015(3) 0.010(3) 0.009(3) -0.005(2) 0.001(2) 0.000(2) 
C37 0.013(3) 0.008(3) 0.011(3) -0.003(2) 0.001(2) 0.003(2) 
C38 0.017(3) 0.017(3) 0.012(3) -0.004(2) 0.000(2) -0.001(2) 
C39 0.030(3) 0.029(4) 0.016(3) -0.014(3) -0.003(3) 0.000(3) 
C40 0.023(3) 0.025(3) 0.014(3) -0.006(3) 0.007(2) -0.005(3) 
C41 0.017(3) 0.023(3) 0.017(3) -0.009(2) -0.003(2) -0.008(2) 
C42 0.014(3) 0.012(3) 0.013(3) -0.003(2) -0.001(2) 0.000(2) 
C43 0.011(3) 0.011(3) 0.008(3) -0.001(2) 0.003(2) -0.002(2) 
C44 0.012(3) 0.010(3) 0.014(3) -0.005(2) 0.000(2) 0.000(2) 
C45 0.009(2) 0.012(3) 0.007(2) -0.001(2) 0.0024(19) -0.001(2) 
C46 0.009(2) 0.015(3) 0.005(2) -0.001(2) 0.0019(19) -0.001(2) 
C47 0.008(2) 0.011(3) 0.010(3) -0.001(2) 0.0043(19) -0.004(2) 
C48 0.011(2) 0.010(3) 0.008(2) -0.001(2) 0.0024(19) -0.002(2) 
C49 0.016(3) 0.009(3) 0.015(3) -0.002(2) -0.001(2) -0.002(2) 
C50 0.010(2) 0.011(3) 0.008(2) -0.002(2) 0.000(2) -0.001(2) 
C51 0.014(3) 0.008(3) 0.006(2) 0.001(2) 0.001(2) 0.002(2) 
C52 0.017(3) 0.010(3) 0.011(3) -0.001(2) -0.003(2) -0.003(2) 
C53 0.026(3) 0.017(3) 0.013(3) -0.007(2) 0.002(2) -0.001(2) 
C54 0.019(3) 0.018(3) 0.017(3) -0.005(2) 0.006(2) -0.003(2) 
C55 0.014(3) 0.014(3) 0.015(3) -0.001(2) -0.001(2) -0.005(2) 
C56 0.015(3) 0.008(3) 0.011(3) -0.001(2) 0.000(2) 0.000(2) 
C57 0.032(4) 0.034(4) 0.032(4) -0.018(3) -0.001(3) -0.002(3) 
C58 0.044(4) 0.023(4) 0.023(3) -0.006(3) -0.011(3) -0.006(3) 
C59 0.017(3) 0.024(3) 0.021(3) -0.008(3) -0.010(2) -0.003(2) 
C60 0.026(4) 0.050(5) 0.024(4) -0.008(3) -0.001(3) -0.004(3) 
C61 0.035(4) 0.033(4) 0.028(4) -0.014(3) -0.001(3) -0.013(3) 
C62 0.032(4) 0.035(4) 0.029(4) -0.011(3) 0.008(3) -0.013(3) 
C63 0.029(4) 0.030(4) 0.034(4) -0.017(3) 0.010(3) -0.003(3) 
C64 0.042(4) 0.029(4) 0.023(3) -0.011(3) 0.002(3) -0.012(3) 
C65 0.021(3) 0.022(3) 0.010(3) -0.003(2) -0.001(2) -0.002(3) 
C66 0.044(4) 0.035(4) 0.023(4) -0.009(3) -0.011(3) 0.001(3) 
C67 0.034(4) 0.036(4) 0.055(5) -0.017(4) -0.020(4) -0.001(3) 
C68 0.023(3) 0.037(4) 0.031(4) -0.020(3) -0.003(3) -0.004(3) 
C69 0.036(4) 0.067(6) 0.026(4) -0.002(4) 0.004(3) 0.017(4) 
C70 0.063(6) 0.052(5) 0.044(5) -0.018(4) 0.001(4) -0.016(4) 
C71 0.060(6) 0.055(6) 0.032(4) -0.013(4) 0.014(4) -0.007(4) 
C72 0.062(5) 0.036(4) 0.026(4) -0.020(3) 0.017(3) -0.020(4) 
C73 0.037(4) 0.018(4) 0.063(5) -0.007(4) 0.018(4) 0.003(3) 
C74 0.039(4) 0.019(3) 0.017(3) -0.009(3) -0.007(3) -0.003(3) 
C75 0.037(4) 0.032(4) 0.029(4) -0.007(3) 0.008(3) -0.009(3) 
C76 0.023(3) 0.039(4) 0.022(3) -0.007(3) -0.003(3) 0.001(3) 
C77 0.021(3) 0.027(4) 0.030(4) 0.001(3) 0.002(3) -0.007(3) 
C78 0.033(4) 0.032(4) 0.015(3) -0.009(3) -0.001(3) -0.007(3) 
C79 0.023(3) 0.023(3) 0.033(4) -0.010(3) -0.005(3) -0.007(3) 
C80 0.023(3) 0.018(3) 0.016(3) -0.007(2) -0.003(2) 0.002(2) 
 
_geom_special_details 
; 
 All esds (except the esd in the dihedral angle between two l.s. planes) 
 are estimated using the full covariance matrix.  The cell esds are taken 
 into account individually in the estimation of esds in distances, angles 
 and torsion angles; correlations between esds in cell parameters are only 
 used when they are defined by crystal symmetry.  An approximate (isotropic) 
 treatment of cell esds is used for estimating esds involving l.s. planes. 
; 
 
loop_ 
 _geom_bond_atom_site_label_1 
 _geom_bond_atom_site_label_2 
 _geom_bond_distance 
 _geom_bond_site_symmetry_2 
 _geom_bond_publ_flag 
Br1 C13 1.905(6) . ? 
Br2 C27 1.902(5) . ? 
Br3 C41 1.904(5) . ? 
Br4 C55 1.905(5) . ? 
O1 C3 1.381(6) . ? 
O1 H1 0.8400 . ? 
O2 C5 1.390(6) . ? 
O2 H2 0.8400 . ? 
O3 C10 1.359(7) . ? 
O3 H3 0.8400 . ? 
O4 C16 1.366(6) . ? 
O4 H4 0.8400 . ? 
O5 C18 1.372(6) . ? 
O5 H5 0.8400 . ? 
O6 C24 1.357(7) . ? 
O6 H6 0.8400 . ? 
O7 C30 1.369(6) . ? 
O7 H7 0.8400 . ? 
O8 C32 1.372(6) . ? 
O8 H8 0.8400 . ? 
O9 C38 1.360(7) . ? 
O9 H9 0.8400 . ? 
O10 C44 1.379(6) . ? 
O10 H10 0.8400 . ? 
O11 C46 1.375(6) . ? 
O11 H11 0.8400 . ? 
O12 C52 1.361(6) . ? 
O12 H12 0.8400 . ? 
O13 C59 1.244(7) . ? 
O14 C62 1.239(8) . ? 
O15 C65 1.231(7) . ? 
O16 C68 1.234(8) . ? 
O17 C71 1.279(10) . ? 
O18 C74 1.192(8) . ? 
O19 C77 1.240(8) . ? 
O20 C80 1.248(7) . ? 
O1W H1WA 0.818(10) . ? 
O1W H1WB 0.820(10) . ? 
O2W H2WA 0.821(10) . ? 
O2W H2WB 0.822(10) . ? 
O3W H3WA 0.822(10) . ? 
O3W H3WB 0.819(10) . ? 
O4W H4WA 0.820(10) . ? 
O4W H4WB 0.822(10) . ? 
N1 C59 1.319(8) . ? 
N1 C58 1.451(8) . ? 
N1 C57 1.451(8) . ? 
N2 C62 1.314(9) . ? 
N2 C60 1.445(8) . ? 
N2 C61 1.457(8) . ? 
N3 C65 1.325(8) . ? 
N3 C64 1.438(8) . ? 
N3 C63 1.453(8) . ? 
N4 C68 1.327(8) . ? 
N4 C66 1.449(9) . ? 
N4 C67 1.450(9) . ? 
N5 C71 1.284(10) . ? 
N5 C69 1.423(9) . ? 
N5 C70 1.501(10) . ? 
N6 C74 1.336(8) . ? 
N6 C73 1.443(9) . ? 
N6 C72 1.446(9) . ? 
N7 C77 1.315(9) . ? 
N7 C75 1.447(9) . ? 
N7 C76 1.456(8) . ? 
N8 C80 1.322(7) . ? 
N8 C79 1.454(7) . ? 
N8 C78 1.463(8) . ? 
C1 C2 1.388(8) . ? 
C1 C6 1.403(7) . ? 
C1 H1A 0.9500 . ? 
C2 C3 1.396(7) . ? 
C2 C50 1.525(7) . ? 
C3 C4 1.400(7) . ? 
C4 C5 1.391(8) . ? 
C4 C7 1.493(8) . ? 
C5 C6 1.386(8) . ? 
C6 C8 1.518(7) . ? 
C7 H7A 0.9800 . ? 
C7 H7B 0.9800 . ? 
C7 H7C 0.9800 . ? 
C8 C9 1.518(7) . ? 
C8 C15 1.527(7) . ? 
C8 H8A 1.0000 . ? 
C9 C14 1.377(8) . ? 
C9 C10 1.412(7) . ? 
C10 C11 1.389(8) . ? 
C11 C12 1.378(8) . ? 
C11 H11A 0.9500 . ? 
C12 C13 1.375(8) . ? 
C12 H12A 0.9500 . ? 
C13 C14 1.397(8) . ? 
C14 H14 0.9500 . ? 
C15 C20 1.385(7) . ? 
C15 C16 1.394(8) . ? 
C16 C17 1.401(7) . ? 
C17 C18 1.399(7) . ? 
C17 C21 1.500(7) . ? 
C18 C19 1.394(7) . ? 
C19 C20 1.392(7) . ? 
C19 C22 1.526(7) . ? 
C20 H20 0.9500 . ? 
C21 H21A 0.9800 . ? 
C21 H21B 0.9800 . ? 
C21 H21C 0.9800 . ? 
C22 C29 1.520(7) . ? 
C22 C23 1.527(7) . ? 
C22 H22 1.0000 . ? 
C23 C28 1.385(8) . ? 
C23 C24 1.399(8) . ? 
C24 C25 1.399(8) . ? 
C25 C26 1.389(8) . ? 
C25 H25 0.9500 . ? 
C26 C27 1.363(8) . ? 
C26 H26 0.9500 . ? 
C27 C28 1.395(8) . ? 
C28 H28 0.9500 . ? 
C29 C34 1.384(8) . ? 
C29 C30 1.389(7) . ? 
C30 C31 1.403(7) . ? 
C31 C32 1.413(8) . ? 
C31 C35 1.505(7) . ? 
C32 C33 1.389(7) . ? 
C33 C34 1.398(7) . ? 
C33 C36 1.536(7) . ? 
C34 H34 0.9500 . ? 
C35 H35A 0.9800 . ? 
C35 H35B 0.9800 . ? 
C35 H35C 0.9800 . ? 
C36 C37 1.519(7) . ? 
C36 C43 1.530(7) . ? 
C36 H36 1.0000 . ? 
C37 C42 1.396(7) . ? 
C37 C38 1.398(8) . ? 
C38 C39 1.390(8) . ? 
C39 C40 1.392(9) . ? 
C39 H39 0.9500 . ? 
C40 C41 1.375(8) . ? 
C40 H40 0.9500 . ? 
C41 C42 1.375(8) . ? 
C42 H42 0.9500 . ? 
C43 C48 1.392(7) . ? 
C43 C44 1.393(8) . ? 
C44 C45 1.397(7) . ? 
C45 C46 1.394(7) . ? 
C45 C49 1.517(7) . ? 
C46 C47 1.407(7) . ? 
C47 C48 1.388(7) . ? 
C47 C50 1.518(7) . ? 
C48 H48 0.9500 . ? 
C49 H49A 0.9800 . ? 
C49 H49B 0.9800 . ? 
C49 H49C 0.9800 . ? 
C50 C51 1.525(7) . ? 
C50 H50 1.0000 . ? 
C51 C56 1.389(7) . ? 
C51 C52 1.418(7) . ? 
C52 C53 1.397(8) . ? 
C53 C54 1.384(8) . ? 
C53 H53 0.9500 . ? 
C54 C55 1.377(8) . ? 
C54 H54 0.9500 . ? 
C55 C56 1.394(8) . ? 
C56 H56 0.9500 . ? 
C57 H57A 0.9800 . ? 
C57 H57B 0.9800 . ? 
C57 H57C 0.9800 . ? 
C58 H58A 0.9800 . ? 
C58 H58B 0.9800 . ? 
C58 H58C 0.9800 . ? 
C59 H59 0.9500 . ? 
C60 H60A 0.9800 . ? 
C60 H60B 0.9800 . ? 
C60 H60C 0.9800 . ? 
C61 H61A 0.9800 . ? 
C61 H61B 0.9800 . ? 
C61 H61C 0.9800 . ? 
C62 H62 0.9500 . ? 
C63 H63A 0.9800 . ? 
C63 H63B 0.9800 . ? 
C63 H63C 0.9800 . ? 
C64 H64A 0.9800 . ? 
C64 H64B 0.9800 . ? 
C64 H64C 0.9800 . ? 
C65 H65 0.9500 . ? 
C66 H66A 0.9800 . ? 
C66 H66B 0.9800 . ? 
C66 H66C 0.9800 . ? 
C67 H67A 0.9800 . ? 
C67 H67B 0.9800 . ? 
C67 H67C 0.9800 . ? 
C68 H68 0.9500 . ? 
C69 H69A 0.9800 . ? 
C69 H69B 0.9800 . ? 
C69 H69C 0.9800 . ? 
C70 H70A 0.9800 . ? 
C70 H70B 0.9800 . ? 
C70 H70C 0.9800 . ? 
C71 H71 0.9500 . ? 
C72 H72A 0.9800 . ? 
C72 H72B 0.9800 . ? 
C72 H72C 0.9800 . ? 
C73 H73A 0.9800 . ? 
C73 H73B 0.9800 . ? 
C73 H73C 0.9800 . ? 
C74 H74 0.9500 . ? 
C75 H75A 0.9800 . ? 
C75 H75B 0.9800 . ? 
C75 H75C 0.9800 . ? 
C76 H76A 0.9800 . ? 
C76 H76B 0.9800 . ? 
C76 H76C 0.9800 . ? 
C77 H77 0.9500 . ? 
C78 H78A 0.9800 . ? 
C78 H78B 0.9800 . ? 
C78 H78C 0.9800 . ? 
C79 H79A 0.9800 . ? 
C79 H79B 0.9800 . ? 
C79 H79C 0.9800 . ? 
C80 H80 0.9500 . ? 
 
loop_ 
 _geom_angle_atom_site_label_1 
 _geom_angle_atom_site_label_2 
 _geom_angle_atom_site_label_3 
 _geom_angle 
 _geom_angle_site_symmetry_1 
 _geom_angle_site_symmetry_3 
 _geom_angle_publ_flag 
C3 O1 H1 109.5 . . ? 
C5 O2 H2 109.5 . . ? 
C10 O3 H3 109.5 . . ? 
C16 O4 H4 109.5 . . ? 
C18 O5 H5 109.5 . . ? 
C24 O6 H6 109.5 . . ? 
C30 O7 H7 109.5 . . ? 
C32 O8 H8 109.5 . . ? 
C38 O9 H9 109.5 . . ? 
C44 O10 H10 109.5 . . ? 
C46 O11 H11 109.5 . . ? 
C52 O12 H12 109.5 . . ? 
H1WA O1W H1WB 103(8) . . ? 
H2WA O2W H2WB 96(8) . . ? 
H3WA O3W H3WB 124(8) . . ? 
H4WA O4W H4WB 109(9) . . ? 
C59 N1 C58 120.7(6) . . ? 
C59 N1 C57 121.2(5) . . ? 
C58 N1 C57 118.1(5) . . ? 
C62 N2 C60 120.6(6) . . ? 
C62 N2 C61 121.7(6) . . ? 
C60 N2 C61 117.6(6) . . ? 
C65 N3 C64 121.5(5) . . ? 
C65 N3 C63 118.7(5) . . ? 
C64 N3 C63 119.0(5) . . ? 
C68 N4 C66 121.8(6) . . ? 
C68 N4 C67 120.8(6) . . ? 
C66 N4 C67 117.4(5) . . ? 
C71 N5 C69 128.5(7) . . ? 
C71 N5 C70 120.0(7) . . ? 
C69 N5 C70 111.3(6) . . ? 
C74 N6 C73 121.0(6) . . ? 
C74 N6 C72 120.4(6) . . ? 
C73 N6 C72 118.6(6) . . ? 
C77 N7 C75 120.6(6) . . ? 
C77 N7 C76 121.5(6) . . ? 
C75 N7 C76 117.8(6) . . ? 
C80 N8 C79 121.9(5) . . ? 
C80 N8 C78 121.3(5) . . ? 
C79 N8 C78 116.7(5) . . ? 
C2 C1 C6 122.6(5) . . ? 
C2 C1 H1A 118.7 . . ? 
C6 C1 H1A 118.7 . . ? 
C1 C2 C3 117.5(5) . . ? 
C1 C2 C50 121.4(5) . . ? 
C3 C2 C50 121.1(5) . . ? 
O1 C3 C2 116.9(5) . . ? 
O1 C3 C4 120.8(5) . . ? 
C2 C3 C4 122.2(5) . . ? 
C5 C4 C3 117.5(5) . . ? 
C5 C4 C7 120.4(5) . . ? 
C3 C4 C7 122.0(5) . . ? 
C6 C5 O2 120.1(5) . . ? 
C6 C5 C4 122.8(5) . . ? 
O2 C5 C4 117.1(5) . . ? 
C5 C6 C1 117.3(5) . . ? 
C5 C6 C8 120.5(5) . . ? 
C1 C6 C8 122.3(5) . . ? 
C4 C7 H7A 109.5 . . ? 
C4 C7 H7B 109.5 . . ? 
H7A C7 H7B 109.5 . . ? 
C4 C7 H7C 109.5 . . ? 
H7A C7 H7C 109.5 . . ? 
H7B C7 H7C 109.5 . . ? 
C6 C8 C9 111.4(4) . . ? 
C6 C8 C15 112.3(4) . . ? 
C9 C8 C15 113.6(4) . . ? 
C6 C8 H8A 106.4 . . ? 
C9 C8 H8A 106.4 . . ? 
C15 C8 H8A 106.4 . . ? 
C14 C9 C10 118.2(5) . . ? 
C14 C9 C8 122.2(5) . . ? 
C10 C9 C8 119.5(5) . . ? 
O3 C10 C11 122.6(5) . . ? 
O3 C10 C9 117.4(5) . . ? 
C11 C10 C9 120.0(5) . . ? 
C12 C11 C10 121.1(5) . . ? 
C12 C11 H11A 119.4 . . ? 
C10 C11 H11A 119.4 . . ? 
C13 C12 C11 119.1(5) . . ? 
C13 C12 H12A 120.5 . . ? 
C11 C12 H12A 120.5 . . ? 
C12 C13 C14 120.6(5) . . ? 
C12 C13 Br1 120.0(4) . . ? 
C14 C13 Br1 119.4(4) . . ? 
C9 C14 C13 121.0(5) . . ? 
C9 C14 H14 119.5 . . ? 
C13 C14 H14 119.5 . . ? 
C20 C15 C16 118.1(5) . . ? 
C20 C15 C8 122.4(5) . . ? 
C16 C15 C8 119.4(5) . . ? 
O4 C16 C15 116.0(5) . . ? 
O4 C16 C17 122.1(5) . . ? 
C15 C16 C17 121.9(5) . . ? 
C18 C17 C16 117.7(5) . . ? 
C18 C17 C21 121.3(5) . . ? 
C16 C17 C21 121.0(5) . . ? 
O5 C18 C19 115.9(5) . . ? 
O5 C18 C17 122.2(5) . . ? 
C19 C18 C17 121.8(5) . . ? 
C20 C19 C18 118.2(5) . . ? 
C20 C19 C22 121.5(5) . . ? 
C18 C19 C22 120.3(5) . . ? 
C15 C20 C19 122.2(5) . . ? 
C15 C20 H20 118.9 . . ? 
C19 C20 H20 118.9 . . ? 
C17 C21 H21A 109.5 . . ? 
C17 C21 H21B 109.5 . . ? 
H21A C21 H21B 109.5 . . ? 
C17 C21 H21C 109.5 . . ? 
H21A C21 H21C 109.5 . . ? 
H21B C21 H21C 109.5 . . ? 
C29 C22 C19 110.8(4) . . ? 
C29 C22 C23 113.0(4) . . ? 
C19 C22 C23 113.0(4) . . ? 
C29 C22 H22 106.5 . . ? 
C19 C22 H22 106.5 . . ? 
C23 C22 H22 106.5 . . ? 
C28 C23 C24 118.9(5) . . ? 
C28 C23 C22 122.6(5) . . ? 
C24 C23 C22 118.5(5) . . ? 
O6 C24 C23 117.9(5) . . ? 
O6 C24 C25 121.9(5) . . ? 
C23 C24 C25 120.2(5) . . ? 
C26 C25 C24 119.9(5) . . ? 
C26 C25 H25 120.1 . . ? 
C24 C25 H25 120.1 . . ? 
C27 C26 C25 119.7(5) . . ? 
C27 C26 H26 120.1 . . ? 
C25 C26 H26 120.1 . . ? 
C26 C27 C28 121.1(5) . . ? 
C26 C27 Br2 120.6(4) . . ? 
C28 C27 Br2 118.3(4) . . ? 
C23 C28 C27 120.2(5) . . ? 
C23 C28 H28 119.9 . . ? 
C27 C28 H28 119.9 . . ? 
C34 C29 C30 118.2(5) . . ? 
C34 C29 C22 122.8(5) . . ? 
C30 C29 C22 119.0(5) . . ? 
O7 C30 C29 117.2(5) . . ? 
O7 C30 C31 120.5(5) . . ? 
C29 C30 C31 122.3(5) . . ? 
C30 C31 C32 117.3(5) . . ? 
C30 C31 C35 121.6(5) . . ? 
C32 C31 C35 121.0(5) . . ? 
O8 C32 C33 122.4(5) . . ? 
O8 C32 C31 116.0(4) . . ? 
C33 C32 C31 121.6(5) . . ? 
C32 C33 C34 118.3(5) . . ? 
C32 C33 C36 120.5(5) . . ? 
C34 C33 C36 121.2(5) . . ? 
C29 C34 C33 122.2(5) . . ? 
C29 C34 H34 118.9 . . ? 
C33 C34 H34 118.9 . . ? 
C31 C35 H35A 109.5 . . ? 
C31 C35 H35B 109.5 . . ? 
H35A C35 H35B 109.5 . . ? 
C31 C35 H35C 109.5 . . ? 
H35A C35 H35C 109.5 . . ? 
H35B C35 H35C 109.5 . . ? 
C37 C36 C43 112.7(4) . . ? 
C37 C36 C33 111.7(4) . . ? 
C43 C36 C33 112.2(4) . . ? 
C37 C36 H36 106.5 . . ? 
C43 C36 H36 106.5 . . ? 
C33 C36 H36 106.5 . . ? 
C42 C37 C38 118.3(5) . . ? 
C42 C37 C36 122.4(5) . . ? 
C38 C37 C36 119.2(5) . . ? 
O9 C38 C39 121.9(5) . . ? 
O9 C38 C37 117.6(5) . . ? 
C39 C38 C37 120.4(5) . . ? 
C38 C39 C40 120.3(5) . . ? 
C38 C39 H39 119.9 . . ? 
C40 C39 H39 119.9 . . ? 
C41 C40 C39 119.1(5) . . ? 
C41 C40 H40 120.5 . . ? 
C39 C40 H40 120.5 . . ? 
C40 C41 C42 121.2(5) . . ? 
C40 C41 Br3 118.8(4) . . ? 
C42 C41 Br3 119.9(4) . . ? 
C41 C42 C37 120.6(5) . . ? 
C41 C42 H42 119.7 . . ? 
C37 C42 H42 119.7 . . ? 
C48 C43 C44 117.9(5) . . ? 
C48 C43 C36 121.2(5) . . ? 
C44 C43 C36 120.8(5) . . ? 
O10 C44 C43 120.2(5) . . ? 
O10 C44 C45 117.5(5) . . ? 
C43 C44 C45 122.3(5) . . ? 
C46 C45 C44 117.7(5) . . ? 
C46 C45 C49 121.7(5) . . ? 
C44 C45 C49 120.5(5) . . ? 
O11 C46 C45 123.2(5) . . ? 
O11 C46 C47 115.1(5) . . ? 
C45 C46 C47 121.6(5) . . ? 
C48 C47 C46 118.1(5) . . ? 
C48 C47 C50 121.6(5) . . ? 
C46 C47 C50 120.2(5) . . ? 
C47 C48 C43 122.1(5) . . ? 
C47 C48 H48 118.9 . . ? 
C43 C48 H48 118.9 . . ? 
C45 C49 H49A 109.5 . . ? 
C45 C49 H49B 109.5 . . ? 
H49A C49 H49B 109.5 . . ? 
C45 C49 H49C 109.5 . . ? 
H49A C49 H49C 109.5 . . ? 
H49B C49 H49C 109.5 . . ? 
C47 C50 C51 111.4(4) . . ? 
C47 C50 C2 110.4(4) . . ? 
C51 C50 C2 112.5(4) . . ? 
C47 C50 H50 107.4 . . ? 
C51 C50 H50 107.4 . . ? 
C2 C50 H50 107.4 . . ? 
C56 C51 C52 118.3(5) . . ? 
C56 C51 C50 122.7(5) . . ? 
C52 C51 C50 119.1(5) . . ? 
O12 C52 C53 122.0(5) . . ? 
O12 C52 C51 117.9(5) . . ? 
C53 C52 C51 120.1(5) . . ? 
C54 C53 C52 120.8(5) . . ? 
C54 C53 H53 119.6 . . ? 
C52 C53 H53 119.6 . . ? 
C55 C54 C53 119.0(5) . . ? 
C55 C54 H54 120.5 . . ? 
C53 C54 H54 120.5 . . ? 
C54 C55 C56 121.5(5) . . ? 
C54 C55 Br4 119.8(4) . . ? 
C56 C55 Br4 118.6(4) . . ? 
C51 C56 C55 120.3(5) . . ? 
C51 C56 H56 119.8 . . ? 
C55 C56 H56 119.8 . . ? 
N1 C57 H57A 109.5 . . ? 
N1 C57 H57B 109.5 . . ? 
H57A C57 H57B 109.5 . . ? 
N1 C57 H57C 109.5 . . ? 
H57A C57 H57C 109.5 . . ? 
H57B C57 H57C 109.5 . . ? 
N1 C58 H58A 109.5 . . ? 
N1 C58 H58B 109.5 . . ? 
H58A C58 H58B 109.5 . . ? 
N1 C58 H58C 109.5 . . ? 
H58A C58 H58C 109.5 . . ? 
H58B C58 H58C 109.5 . . ? 
O13 C59 N1 126.5(6) . . ? 
O13 C59 H59 116.8 . . ? 
N1 C59 H59 116.8 . . ? 
N2 C60 H60A 109.5 . . ? 
N2 C60 H60B 109.5 . . ? 
H60A C60 H60B 109.5 . . ? 
N2 C60 H60C 109.5 . . ? 
H60A C60 H60C 109.5 . . ? 
H60B C60 H60C 109.5 . . ? 
N2 C61 H61A 109.5 . . ? 
N2 C61 H61B 109.5 . . ? 
H61A C61 H61B 109.5 . . ? 
N2 C61 H61C 109.5 . . ? 
H61A C61 H61C 109.5 . . ? 
H61B C61 H61C 109.5 . . ? 
O14 C62 N2 125.7(7) . . ? 
O14 C62 H62 117.1 . . ? 
N2 C62 H62 117.1 . . ? 
N3 C63 H63A 109.5 . . ? 
N3 C63 H63B 109.5 . . ? 
H63A C63 H63B 109.5 . . ? 
N3 C63 H63C 109.5 . . ? 
H63A C63 H63C 109.5 . . ? 
H63B C63 H63C 109.5 . . ? 
N3 C64 H64A 109.5 . . ? 
N3 C64 H64B 109.5 . . ? 
H64A C64 H64B 109.5 . . ? 
N3 C64 H64C 109.5 . . ? 
H64A C64 H64C 109.5 . . ? 
H64B C64 H64C 109.5 . . ? 
O15 C65 N3 125.2(6) . . ? 
O15 C65 H65 117.4 . . ? 
N3 C65 H65 117.4 . . ? 
N4 C66 H66A 109.5 . . ? 
N4 C66 H66B 109.5 . . ? 
H66A C66 H66B 109.5 . . ? 
N4 C66 H66C 109.5 . . ? 
H66A C66 H66C 109.5 . . ? 
H66B C66 H66C 109.5 . . ? 
N4 C67 H67A 109.5 . . ? 
N4 C67 H67B 109.5 . . ? 
H67A C67 H67B 109.5 . . ? 
N4 C67 H67C 109.5 . . ? 
H67A C67 H67C 109.5 . . ? 
H67B C67 H67C 109.5 . . ? 
O16 C68 N4 125.0(6) . . ? 
O16 C68 H68 117.5 . . ? 
N4 C68 H68 117.5 . . ? 
N5 C69 H69A 109.5 . . ? 
N5 C69 H69B 109.5 . . ? 
H69A C69 H69B 109.5 . . ? 
N5 C69 H69C 109.5 . . ? 
H69A C69 H69C 109.5 . . ? 
H69B C69 H69C 109.5 . . ? 
N5 C70 H70A 109.5 . . ? 
N5 C70 H70B 109.5 . . ? 
H70A C70 H70B 109.5 . . ? 
N5 C70 H70C 109.5 . . ? 
H70A C70 H70C 109.5 . . ? 
H70B C70 H70C 109.5 . . ? 
O17 C71 N5 122.0(9) . . ? 
O17 C71 H71 119.0 . . ? 
N5 C71 H71 119.0 . . ? 
N6 C72 H72A 109.5 . . ? 
N6 C72 H72B 109.5 . . ? 
H72A C72 H72B 109.5 . . ? 
N6 C72 H72C 109.5 . . ? 
H72A C72 H72C 109.5 . . ? 
H72B C72 H72C 109.5 . . ? 
N6 C73 H73A 109.5 . . ? 
N6 C73 H73B 109.5 . . ? 
H73A C73 H73B 109.5 . . ? 
N6 C73 H73C 109.5 . . ? 
H73A C73 H73C 109.5 . . ? 
H73B C73 H73C 109.5 . . ? 
O18 C74 N6 125.0(6) . . ? 
O18 C74 H74 117.5 . . ? 
N6 C74 H74 117.5 . . ? 
N7 C75 H75A 109.5 . . ? 
N7 C75 H75B 109.5 . . ? 
H75A C75 H75B 109.5 . . ? 
N7 C75 H75C 109.5 . . ? 
H75A C75 H75C 109.5 . . ? 
H75B C75 H75C 109.5 . . ? 
N7 C76 H76A 109.5 . . ? 
N7 C76 H76B 109.5 . . ? 
H76A C76 H76B 109.5 . . ? 
N7 C76 H76C 109.5 . . ? 
H76A C76 H76C 109.5 . . ? 
H76B C76 H76C 109.5 . . ? 
O19 C77 N7 125.7(7) . . ? 
O19 C77 H77 117.1 . . ? 
N7 C77 H77 117.1 . . ? 
N8 C78 H78A 109.5 . . ? 
N8 C78 H78B 109.5 . . ? 
H78A C78 H78B 109.5 . . ? 
N8 C78 H78C 109.5 . . ? 
H78A C78 H78C 109.5 . . ? 
H78B C78 H78C 109.5 . . ? 
N8 C79 H79A 109.5 . . ? 
N8 C79 H79B 109.5 . . ? 
H79A C79 H79B 109.5 . . ? 
N8 C79 H79C 109.5 . . ? 
H79A C79 H79C 109.5 . . ? 
H79B C79 H79C 109.5 . . ? 
O20 C80 N8 125.5(6) . . ? 
O20 C80 H80 117.3 . . ? 
N8 C80 H80 117.3 . . ? 
 
loop_ 
 _geom_torsion_atom_site_label_1 
 _geom_torsion_atom_site_label_2 
 _geom_torsion_atom_site_label_3 
 _geom_torsion_atom_site_label_4 
 _geom_torsion 
 _geom_torsion_site_symmetry_1 
 _geom_torsion_site_symmetry_2 
 _geom_torsion_site_symmetry_3 
 _geom_torsion_site_symmetry_4 
 _geom_torsion_publ_flag 
C6 C1 C2 C3 -0.7(8) . . . . ? 
C6 C1 C2 C50 178.5(5) . . . . ? 
C1 C2 C3 O1 -178.6(4) . . . . ? 
C50 C2 C3 O1 2.1(7) . . . . ? 
C1 C2 C3 C4 4.4(8) . . . . ? 
C50 C2 C3 C4 -174.8(5) . . . . ? 
O1 C3 C4 C5 179.0(5) . . . . ? 
C2 C3 C4 C5 -4.1(8) . . . . ? 
O1 C3 C4 C7 -2.7(8) . . . . ? 
C2 C3 C4 C7 174.1(5) . . . . ? 
C3 C4 C5 C6 0.1(8) . . . . ? 
C7 C4 C5 C6 -178.1(5) . . . . ? 
C3 C4 C5 O2 180.0(4) . . . . ? 
C7 C4 C5 O2 1.7(8) . . . . ? 
O2 C5 C6 C1 -176.5(5) . . . . ? 
C4 C5 C6 C1 3.3(8) . . . . ? 
O2 C5 C6 C8 1.9(7) . . . . ? 
C4 C5 C6 C8 -178.3(5) . . . . ? 
C2 C1 C6 C5 -3.0(8) . . . . ? 
C2 C1 C6 C8 178.6(5) . . . . ? 
C5 C6 C8 C9 164.1(5) . . . . ? 
C1 C6 C8 C9 -17.6(7) . . . . ? 
C5 C6 C8 C15 -67.3(6) . . . . ? 
C1 C6 C8 C15 111.0(5) . . . . ? 
C6 C8 C9 C14 90.9(6) . . . . ? 
C15 C8 C9 C14 -37.0(7) . . . . ? 
C6 C8 C9 C10 -85.0(6) . . . . ? 
C15 C8 C9 C10 147.1(5) . . . . ? 
C14 C9 C10 O3 -177.2(5) . . . . ? 
C8 C9 C10 O3 -1.2(8) . . . . ? 
C14 C9 C10 C11 1.9(8) . . . . ? 
C8 C9 C10 C11 177.9(5) . . . . ? 
O3 C10 C11 C12 177.5(5) . . . . ? 
C9 C10 C11 C12 -1.6(9) . . . . ? 
C10 C11 C12 C13 -0.6(9) . . . . ? 
C11 C12 C13 C14 2.4(9) . . . . ? 
C11 C12 C13 Br1 -177.1(4) . . . . ? 
C10 C9 C14 C13 -0.1(8) . . . . ? 
C8 C9 C14 C13 -176.1(5) . . . . ? 
C12 C13 C14 C9 -2.0(9) . . . . ? 
Br1 C13 C14 C9 177.4(4) . . . . ? 
C6 C8 C15 C20 -24.1(7) . . . . ? 
C9 C8 C15 C20 103.4(6) . . . . ? 
C6 C8 C15 C16 156.5(5) . . . . ? 
C9 C8 C15 C16 -76.1(6) . . . . ? 
C20 C15 C16 O4 -177.5(4) . . . . ? 
C8 C15 C16 O4 2.0(7) . . . . ? 
C20 C15 C16 C17 3.0(8) . . . . ? 
C8 C15 C16 C17 -177.5(5) . . . . ? 
O4 C16 C17 C18 -179.5(5) . . . . ? 
C15 C16 C17 C18 -0.1(8) . . . . ? 
O4 C16 C17 C21 0.8(8) . . . . ? 
C15 C16 C17 C21 -179.7(5) . . . . ? 
C16 C17 C18 O5 175.2(5) . . . . ? 
C21 C17 C18 O5 -5.1(8) . . . . ? 
C16 C17 C18 C19 -2.4(8) . . . . ? 
C21 C17 C18 C19 177.3(5) . . . . ? 
O5 C18 C19 C20 -176.0(4) . . . . ? 
C17 C18 C19 C20 1.7(8) . . . . ? 
O5 C18 C19 C22 6.8(7) . . . . ? 
C17 C18 C19 C22 -175.5(5) . . . . ? 
C16 C15 C20 C19 -3.7(8) . . . . ? 
C8 C15 C20 C19 176.8(5) . . . . ? 
C18 C19 C20 C15 1.4(8) . . . . ? 
C22 C19 C20 C15 178.6(5) . . . . ? 
C20 C19 C22 C29 -33.4(7) . . . . ? 
C18 C19 C22 C29 143.7(5) . . . . ? 
C20 C19 C22 C23 94.5(6) . . . . ? 
C18 C19 C22 C23 -88.4(6) . . . . ? 
C29 C22 C23 C28 109.9(6) . . . . ? 
C19 C22 C23 C28 -16.9(7) . . . . ? 
C29 C22 C23 C24 -71.0(6) . . . . ? 
C19 C22 C23 C24 162.3(5) . . . . ? 
C28 C23 C24 O6 179.1(5) . . . . ? 
C22 C23 C24 O6 -0.1(8) . . . . ? 
C28 C23 C24 C25 -1.8(8) . . . . ? 
C22 C23 C24 C25 179.0(5) . . . . ? 
O6 C24 C25 C26 -178.6(6) . . . . ? 
C23 C24 C25 C26 2.3(9) . . . . ? 
C24 C25 C26 C27 -1.2(9) . . . . ? 
C25 C26 C27 C28 -0.5(9) . . . . ? 
C25 C26 C27 Br2 177.4(5) . . . . ? 
C24 C23 C28 C27 0.1(8) . . . . ? 
C22 C23 C28 C27 179.3(5) . . . . ? 
C26 C27 C28 C23 1.1(9) . . . . ? 
Br2 C27 C28 C23 -176.9(4) . . . . ? 
C19 C22 C29 C34 112.0(5) . . . . ? 
C23 C22 C29 C34 -16.0(7) . . . . ? 
C19 C22 C29 C30 -65.9(6) . . . . ? 
C23 C22 C29 C30 166.2(4) . . . . ? 
C34 C29 C30 O7 176.7(4) . . . . ? 
C22 C29 C30 O7 -5.4(7) . . . . ? 
C34 C29 C30 C31 -1.9(8) . . . . ? 
C22 C29 C30 C31 176.0(5) . . . . ? 
O7 C30 C31 C32 -175.6(4) . . . . ? 
C29 C30 C31 C32 2.9(8) . . . . ? 
O7 C30 C31 C35 2.2(8) . . . . ? 
C29 C30 C31 C35 -179.3(5) . . . . ? 
C30 C31 C32 O8 177.9(4) . . . . ? 
C35 C31 C32 O8 0.2(7) . . . . ? 
C30 C31 C32 C33 -2.1(8) . . . . ? 
C35 C31 C32 C33 -179.9(5) . . . . ? 
O8 C32 C33 C34 -179.8(5) . . . . ? 
C31 C32 C33 C34 0.3(8) . . . . ? 
O8 C32 C33 C36 0.5(8) . . . . ? 
C31 C32 C33 C36 -179.5(5) . . . . ? 
C30 C29 C34 C33 -0.1(7) . . . . ? 
C22 C29 C34 C33 -177.9(5) . . . . ? 
C32 C33 C34 C29 0.9(8) . . . . ? 
C36 C33 C34 C29 -179.4(5) . . . . ? 
C32 C33 C36 C37 -166.6(5) . . . . ? 
C34 C33 C36 C37 13.7(7) . . . . ? 
C32 C33 C36 C43 65.7(6) . . . . ? 
C34 C33 C36 C43 -114.0(5) . . . . ? 
C43 C36 C37 C42 33.8(7) . . . . ? 
C33 C36 C37 C42 -93.7(6) . . . . ? 
C43 C36 C37 C38 -149.5(5) . . . . ? 
C33 C36 C37 C38 83.0(6) . . . . ? 
C42 C37 C38 O9 179.7(5) . . . . ? 
C36 C37 C38 O9 2.9(8) . . . . ? 
C42 C37 C38 C39 -0.4(8) . . . . ? 
C36 C37 C38 C39 -177.2(5) . . . . ? 
O9 C38 C39 C40 180.0(5) . . . . ? 
C37 C38 C39 C40 0.0(9) . . . . ? 
C38 C39 C40 C41 -0.7(9) . . . . ? 
C39 C40 C41 C42 1.7(9) . . . . ? 
C39 C40 C41 Br3 -178.8(5) . . . . ? 
C40 C41 C42 C37 -2.1(9) . . . . ? 
Br3 C41 C42 C37 178.4(4) . . . . ? 
C38 C37 C42 C41 1.4(8) . . . . ? 
C36 C37 C42 C41 178.1(5) . . . . ? 
C37 C36 C43 C48 -95.0(6) . . . . ? 
C33 C36 C43 C48 32.2(7) . . . . ? 
C37 C36 C43 C44 82.5(6) . . . . ? 
C33 C36 C43 C44 -150.3(5) . . . . ? 
C48 C43 C44 O10 176.2(5) . . . . ? 
C36 C43 C44 O10 -1.3(7) . . . . ? 
C48 C43 C44 C45 -3.9(8) . . . . ? 
C36 C43 C44 C45 178.5(5) . . . . ? 
O10 C44 C45 C46 -177.9(4) . . . . ? 
C43 C44 C45 C46 2.3(8) . . . . ? 
O10 C44 C45 C49 0.2(7) . . . . ? 
C43 C44 C45 C49 -179.6(5) . . . . ? 
C44 C45 C46 O11 -175.5(5) . . . . ? 
C49 C45 C46 O11 6.4(8) . . . . ? 
C44 C45 C46 C47 1.0(7) . . . . ? 
C49 C45 C46 C47 -177.1(5) . . . . ? 
O11 C46 C47 C48 174.4(4) . . . . ? 
C45 C46 C47 C48 -2.3(7) . . . . ? 
O11 C46 C47 C50 -3.7(7) . . . . ? 
C45 C46 C47 C50 179.6(5) . . . . ? 
C46 C47 C48 C43 0.6(7) . . . . ? 
C50 C47 C48 C43 178.7(5) . . . . ? 
C44 C43 C48 C47 2.4(7) . . . . ? 
C36 C43 C48 C47 180.0(5) . . . . ? 
C48 C47 C50 C51 -93.4(6) . . . . ? 
C46 C47 C50 C51 84.6(6) . . . . ? 
C48 C47 C50 C2 32.3(6) . . . . ? 
C46 C47 C50 C2 -149.6(5) . . . . ? 
C1 C2 C50 C47 -112.7(5) . . . . ? 
C3 C2 C50 C47 66.5(6) . . . . ? 
C1 C2 C50 C51 12.4(7) . . . . ? 
C3 C2 C50 C51 -168.4(5) . . . . ? 
C47 C50 C51 C56 15.3(7) . . . . ? 
C2 C50 C51 C56 -109.2(6) . . . . ? 
C47 C50 C51 C52 -166.3(5) . . . . ? 
C2 C50 C51 C52 69.1(6) . . . . ? 
C56 C51 C52 O12 -179.8(5) . . . . ? 
C50 C51 C52 O12 1.8(7) . . . . ? 
C56 C51 C52 C53 0.7(8) . . . . ? 
C50 C51 C52 C53 -177.7(5) . . . . ? 
O12 C52 C53 C54 178.9(5) . . . . ? 
C51 C52 C53 C54 -1.7(8) . . . . ? 
C52 C53 C54 C55 0.6(9) . . . . ? 
C53 C54 C55 C56 1.4(9) . . . . ? 
C53 C54 C55 Br4 -178.3(4) . . . . ? 
C52 C51 C56 C55 1.3(8) . . . . ? 
C50 C51 C56 C55 179.6(5) . . . . ? 
C54 C55 C56 C51 -2.4(8) . . . . ? 
Br4 C55 C56 C51 177.3(4) . . . . ? 
C58 N1 C59 O13 179.3(6) . . . . ? 
C57 N1 C59 O13 -2.1(9) . . . . ? 
C60 N2 C62 O14 -2.3(10) . . . . ? 
C61 N2 C62 O14 174.2(6) . . . . ? 
C64 N3 C65 O15 -170.5(6) . . . . ? 
C63 N3 C65 O15 -0.5(9) . . . . ? 
C66 N4 C68 O16 -179.1(6) . . . . ? 
C67 N4 C68 O16 -0.5(10) . . . . ? 
C69 N5 C71 O17 -179.7(7) . . . . ? 
C70 N5 C71 O17 5.6(12) . . . . ? 
C73 N6 C74 O18 -1.4(10) . . . . ? 
C72 N6 C74 O18 -179.9(6) . . . . ? 
C75 N7 C77 O19 0.8(10) . . . . ? 
C76 N7 C77 O19 177.7(6) . . . . ? 
C79 N8 C80 O20 -179.4(6) . . . . ? 
C78 N8 C80 O20 -1.6(9) . . . . ? 

loop_
_geom_hbond_atom_site_label_D 
_geom_hbond_atom_site_label_H 
_geom_hbond_atom_site_label_A 
_geom_hbond_site_symmetry_D

_geom_hbond_site_symmetry_H
_geom_hbond_site_symmetry_A
_geom_hbond_distance_DH
_geom_hbond_distance_HA 
_geom_hbond_distance_DA 
_geom_hbond_angle_DHA 
_geom_hbond_publ_flag

C7    H7B  O2  . .  1_555  0.98   2.31   2.781(8)   109  no
C8    H8A  O3  . .  1_555  1.00   2.38   2.787(7)   103  no
C21   H21A O4  . .  1_555  0.98   2.55   2.903(7)   101  no
C22   H22  O5  . .  1_555  1.00   2.38   2.769(6)   102  no
C35   H35B O8  . .  1_555  0.98   2.32   2.789(8)   109  no
C36   H36  O9  . .  1_555  1.00   2.38   2.774(6)   102  no
C36   H36  O10 . .  1_555  1.00   2.52   2.872(7)   100  no  
C49   H49B O11 . .  1_555  0.98   2.59   2.951(6)   102  no
C50   H50  O11 . .  1_555  1.00   2.40   2.757(6)   100  no
C57   H57A O13 . .  1_555  0.98   2.41   2.821(10)  104  no
C67   H67C O16 . .  1_555  0.98   2.41   2.788(9)   102  no
C70   H70C O17 . .  1_555  0.98   2.31   2.723(12)  105  no
C73   H73A O18 . .  1_555  0.98   2.37   2.776(9)   104  no
C75   H75C O19 . .  1_555  0.98   2.38   2.786(9)   104  no
C78   H78C O20 . .  1_555  0.98   2.41   2.818(8)   104  no
O1W   H1WB O17 . .  1_555  0.82(6) 1.94(6) 2.756(8) 172(3)  yes
O3    H3   O20 . .  1_555  0.84    1.86   2.690(6)  169  yes
O2W   H2WB O20 . .  1_555  0.82(4) 2.08(4) 2.895(7) 173(6) yes
O7    H7   O15 . .  1_555  0.84    1.83   2.576(6)  146  yes
O12   H12  O2W . .  1_555  0.84    1.86   2.696(7)  174  yes
C64   H64B O1W . .  1_555  0.98    2.60   3.514(9)  155  yes                                                                                         
C66   H66B O3W . .  1_555  0.98    2.59   3.400(9)  140  yes
C72   H72B O4  . .  1_555  0.98    2.36   3.337(9)  172  yes
C21   H21B O5  . .  1_555  0.98    2.57   2.913(8)  101  no
C76   H76A O18 . .  1_555  0.98    2.59   3.440(8)  145  yes
O1    H1   O19 . .  2_566  0.84    2.08   2.821(6)  148  yes
O1W   H1WA O13 . .  1_545  0.82(7) 2.03(7) 2.815(7) 161(6) yes
O2W H2WA   O16 . .  1_455  0.82(3) 1.91(4) 2.718(7) 168(10) yes
O4  H4     O3W . .  2_666  0.84    1.90    2.668(6) 152  yes
O5  H5     O7  . .  2_667  0.84    2.06    2.796(5) 145  yes
O3W H3WA   O13 . .  2_676  0.82(5) 1.96(6) 2.756(7) 162(6)  yes
O6  H6     O1W . .  2_667  0.84    1.89    2.718(7) 170  yes
O3W H3WB   O14 . .  1_554  0.82(5) 2.13(5) 2.945(7)  174(9)  yes
O4W H4WA   O17 . .  2_656  0.82(6) 1.94(6)  2.764(8) 174(7)  yes
O8  H8     O18 . .  1_565  0.84    2.01     2.811(6) 159    yes
O4W H4WB   O14 . .  2_666  0.82(5) 1.98(5)  2.778(10) 166(7) yes
O9  H9     O4W . .  1_566  0.84    1.87     2.706(7)  170    yes
O10 H10    O18 . .  1_565  0.84    1.91     2.730(6)  165    yes
O11 H11    O1  . .  2_576  0.84    2.05     2.786(5)  147  yes
C21 H21A   O3W . .  2_666  0.98    2.37     3.325(9)  165  yes
C21 H21B   O7  . .  2_667  0.98    2.47     3.305(7)  143  yes
C21 H21C   O6  . .  2_667  0.98    2.53     3.455(8)  158  yes
C36 H36    O18 . .  1_565  1.00    2.38     3.255(7)  146  yes
C49 H49B   O1  . .  2_576  0.98    2.59     3.444(6)  146  yes           
C59 H59    O4W . .  1_566  0.95    2.51     3.441(8)  167  yes
C61 H61B   O5  . .  2_667  0.98    2.57     3.509(7)  160  yes
C75 H75A   O15 . .  2_666  0.98    2.53     3.453(8)  157  yes
C78 H78A   O16 . .  1_455  0.98    2.59     3.331(9)  133  yes
C79 H79C   O3  . .  2_566  0.98    2.55     3.487(8)  161  yes
C80 H80    O16 . .  2_666  0.95    2.59     3.531(8)  171  yes
 
_diffrn_measured_fraction_theta_max    0.99 
_diffrn_reflns_theta_full              26.0 
_diffrn_measured_fraction_theta_full   0.99 
_refine_diff_density_max    2.66 
_refine_diff_density_min   -0.98 
_refine_diff_density_rms    0.151 
